# Supplementary material
Source: Springer Nature journal article supplement (https://www.springermedizin.de/resource/supplementary/13584_2013_152_MOESM2_ESM.pdf/9676942)

● Immigrants   
 ▲ Israeli graduates   
 ◆ Israeli-born studied abroad

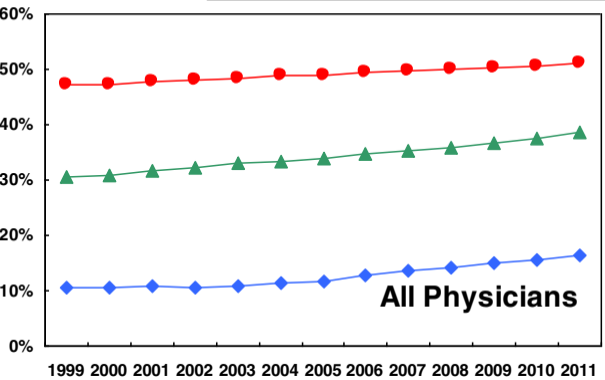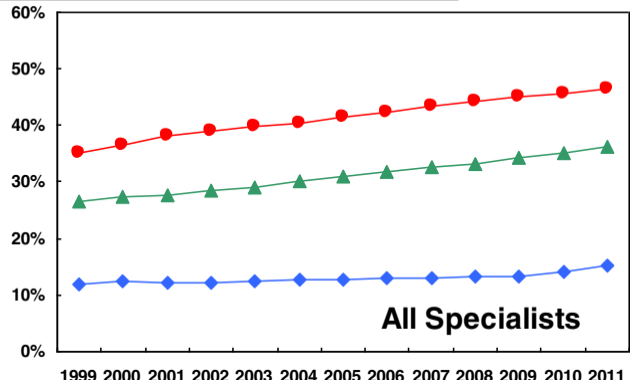

Supplement: MOESM2 [file 9676942]
